# Supplementary material
Source: publisher figshare collection journal article supplement (https://acs.figshare.com/ndownloader/files/7732783)
Supplement: Supplementary file 1 [file 7732783]

#\#CIF_1.1
 
#  CIF produced by WinGX routine CIF_UPDATE
#  Created on 2016-06-12 at 13:34:36
#  Using CIFtbx version 3.0.4  1 Sep 2006
 
#  Dictionary name : cif_core.dic
#  Dictionary vers : 2.4.3
#  Request file    : c:\nauka\wingx\files\archive.reqdat
#  CIF files read  : php661 php661_od
 
#------------------ SECTION 1. GLOBAL INFORMATION ---------------------------#
 
data_global
 
#------------------ AUDIT DETAILS -------------------------------------------#
 
_audit_creation_date            2016-06-12
_audit_creation_method          'WinGX routine CIF_UPDATE'
_audit_conform_dict_name        cif_core.dic
_audit_conform_dict_version     2.4
_audit_conform_dict_location    ftp://ftp.iucr.org/pub/cif_core.dic
_audit_update_record            ?
 
#==============================================================================
#
# SUBMISSION DETAILS
# Name and address of author for correspondence
 
_publ_contact_author_name            'Justyna Kalinowska-T\/lu\'scik' 
_publ_contact_author_address            
;
Faculty of Chemistry, Jagiellonian University, 
R. Ingardena 3, 30-060
Krak\'ow,
Poland
;


_publ_contact_author_email           'kalinows@chemia.uj.edu.pl'
_publ_contact_author_fax             '48126340515'
_publ_contact_author_phone           '48126632268'
 
 
_publ_contact_letter
;
 Submission dated :2016-06-13
 
Please consider this CIF for submission to the Cambridge Crystallographic
Data Centre. I certify that all authors have seen and approved of this
submission, that all have made significant scientific contributions to the
work reported, and that all share responsibility and accountability for
the results.

 
This CIF is submitted as part of a journal submission

 
Justyna Kalinowska-Tluscik
;
 
#==============================================================================
#
# TITLE AND AUTHOR LIST
 
_publ_section_title
; ?
;
_publ_section_title_footnote
; ?
;
 
# The loop structure below should contain the names and addresses of all
# authors, in the required order of publication. Repeat as necessary.
 
loop_
 _publ_author_name
 _publ_author_footnote
 _publ_author_address
?
?
;?
;
 
#------------------  SECTION 2. COMPOUND(S) DETAILS -------------------------#
 
data_php661
 
_audit_creation_date                    2016-06-12T13:34:36-00:00
_audit_creation_method                  'WinGX routine CIF_UPDATE'
 
#----------------------------------------------------------------------------#
#                   CHEMICAL INFORMATION                                     #
#----------------------------------------------------------------------------#
 
_chemical_formula_sum                   'C15 H17 N5 O'
_chemical_formula_moiety 		'C15 H17 N5 O'
_chemical_formula_weight                283.33
 
#----------------------------------------------------------------------------#
#                   UNIT CELL INFORMATION                                    #
#----------------------------------------------------------------------------#
 
loop_
    _symmetry_equiv_pos_as_xyz
'x, y, z'
'-x+1/2, y+1/2, -z'
'-x, -y, -z'
'x-1/2, -y-1/2, z'
 
_symmetry_cell_setting                  monoclinic
_symmetry_space_group_name_H-M          'P 1 21/a 1'
_symmetry_space_group_name_Hall 	'-P 2yab'
_cell_length_a                          6.9311(4)
_cell_length_b                          19.6495(9)
_cell_length_c                          10.2901(5)
_cell_angle_alpha                       90
_cell_angle_beta                        104.068(5)
_cell_angle_gamma                       90
_cell_volume                            1359.40(12)
_cell_formula_units_Z                   4
_cell_measurement_temperature           298(2)
_cell_measurement_reflns_used           2007
_cell_measurement_theta_min             2.9033
_cell_measurement_theta_max             28.4972
 
#----------------------------------------------------------------------------#
#                   CRYSTAL INFORMATION                                      #
#----------------------------------------------------------------------------#
 
_exptl_crystal_description              plate
_exptl_crystal_colour                   white
_exptl_crystal_size_max                 0.3
_exptl_crystal_size_mid                 0.3
_exptl_crystal_size_min                 0.07
_exptl_crystal_density_diffrn           1.384
_exptl_crystal_F_000                    600
 
#----------------------------------------------------------------------------#
#                   ABSORPTION CORRECTION                                    #
#----------------------------------------------------------------------------#
 
_exptl_absorpt_coefficient_mu           0.092
_exptl_absorpt_correction_type          multi-scan
_exptl_absorpt_process_details
;
        CrysAlisPro, Agilent Technologies,
        Version 1.171.36.20 (release 27-06-2012 CrysAlis171 .NET)
        (compiled Jul 11 2012,15:38:31)
        Empirical absorption correction using spherical harmonics,
 implemented in SCALE3 ABSPACK scaling algorithm.
;
_exptl_absorpt_correction_T_min         0.74416
_exptl_absorpt_correction_T_max         1
_shelx_estimated_absorpt_T_min          0.973
_shelx_estimated_absorpt_T_max          0.994
 
#----------------------------------------------------------------------------#
#                   DATA COLLECTION                                          #
#----------------------------------------------------------------------------#
 
_diffrn_ambient_temperature             298(2)
_diffrn_radiation_wavelength            0.71073
_diffrn_radiation_type                  MoK\a
_diffrn_radiation_monochromator         mirror
_diffrn_detector_area_resol_mean        10.3756
_diffrn_orient_matrix_ub_11             -0.0168136
_diffrn_orient_matrix_ub_12             -0.009882
_diffrn_orient_matrix_ub_13             0.062616
_diffrn_orient_matrix_ub_21             -0.0711507
_diffrn_orient_matrix_ub_22             -0.0242236
_diffrn_orient_matrix_ub_23             -0.0328713
_diffrn_orient_matrix_ub_31             0.0760144
_diffrn_orient_matrix_ub_32             -0.0248836
_diffrn_orient_matrix_ub_33             0.0070894
_diffrn_measurement_device_type         'SuperNova, Dual, Cu at zero, Atlas'
_diffrn_measurement_method              '\w scans'
_diffrn_reflns_av_R_equivalents         0.0671
_diffrn_reflns_av_unetI/netI            0.1106
_diffrn_reflns_number                   11153
_diffrn_reflns_limit_h_min              -9
_diffrn_reflns_limit_h_max              5
_diffrn_reflns_limit_k_min              -26
_diffrn_reflns_limit_k_max              24
_diffrn_reflns_limit_l_min              -13
_diffrn_reflns_limit_l_max              13
_diffrn_reflns_theta_min                2.909
_diffrn_reflns_theta_max                28.56
_diffrn_reflns_theta_full               25.242
_diffrn_measured_fraction_theta_full
                                        0.999
_diffrn_measured_fraction_theta_max
                                        0.922
_diffrn_reflns_Laue_measured_fraction_full
                                        0.999
_diffrn_reflns_Laue_measured_fraction_max
                                        0.922
_diffrn_reflns_point_group_measured_fraction_full
                                        0.999
_diffrn_reflns_point_group_measured_fraction_max
                                        0.922
_reflns_Friedel_coverage                0
_reflns_number_total                    3202
_reflns_number_gt                       1960
_reflns_threshold_expression            'I > 2\s(I)'
 
#----------------------------------------------------------------------------#
#                   COMPUTER PROGRAMS USED                                   #
#----------------------------------------------------------------------------#
 
_computing_data_collection
;
        CrysAlisPro, Agilent Technologies,
        Version 1.171.36.20 (release 27-06-2012 CrysAlis171 .NET)
        (compiled Jul 11 2012,15:38:31)
;
_computing_cell_refinement
;
        CrysAlisPro, Agilent Technologies,
        Version 1.171.36.20 (release 27-06-2012 CrysAlis171 .NET)
        (compiled Jul 11 2012,15:38:31)
;
_computing_data_reduction
;
        CrysAlisPro, Agilent Technologies,
        Version 1.171.36.20 (release 27-06-2012 CrysAlis171 .NET)
        (compiled Jul 11 2012,15:38:31)
;
_computing_structure_refinement         'SHELXL-2014/6 (Sheldrick, 2014)'
 
#----------------------------------------------------------------------------#
#                   STRUCTURE SOLUTION                                       #
#----------------------------------------------------------------------------#
 
_atom_sites_solution_hydrogens          mixed
 
#----------------------------------------------------------------------------#
#                   REFINEMENT INFORMATION                                   #
#----------------------------------------------------------------------------#
 
_refine_ls_structure_factor_coef        Fsqd
_refine_ls_matrix_type                  full
_refine_ls_weighting_scheme             calc
_refine_ls_weighting_details
              'w=1/[\s^2^(Fo^2^)+(0.0341P)^2^+0.2279P] where P=(Fo^2^+2Fc^2^)/3'
_refine_ls_hydrogen_treatment           mixed
_refine_ls_extinction_method            none
_refine_ls_number_reflns                3202
_refine_ls_number_parameters            194
_refine_ls_number_restraints            0
_refine_ls_R_factor_all                 0.1096
_refine_ls_R_factor_gt                  0.054
_refine_ls_wR_factor_ref                0.1213
_refine_ls_wR_factor_gt                 0.0957
_refine_ls_goodness_of_fit_ref          1.067
_refine_ls_restrained_S_all             1.067
_refine_ls_shift/su_max                 0
_refine_ls_shift/su_mean                0
_refine_diff_density_max                0.271
_refine_diff_density_min                -0.286
_refine_diff_density_rms                0.061
 
#----------------------------------------------------------------------------#
#                   CONSTRAINTS AND RESTRAINTS                               #
#----------------------------------------------------------------------------#
 
 
#----------------------------------------------------------------------------#
#                   ATOMIC TYPES, COORDINATES AND THERMAL PARAMETERS         #
#----------------------------------------------------------------------------#
 
loop_
    _atom_type_symbol
    _atom_type_description
    _atom_type_scat_dispersion_real
    _atom_type_scat_dispersion_imag
    _atom_type_scat_source
C C 0.0033 0.0016 'International Tables Vol C Tables 4.2.6.8 and 6.1.1.4'
H H 0 0 'International Tables Vol C Tables 4.2.6.8 and 6.1.1.4'
N N 0.0061 0.0033 'International Tables Vol C Tables 4.2.6.8 and 6.1.1.4'
O O 0.0106 0.006 'International Tables Vol C Tables 4.2.6.8 and 6.1.1.4'
 
loop_
    _atom_site_label
    _atom_site_type_symbol
    _atom_site_fract_x
    _atom_site_fract_y
    _atom_site_fract_z
    _atom_site_U_iso_or_equiv
    _atom_site_adp_type
    _atom_site_occupancy
    _atom_site_site_symmetry_order
    _atom_site_calc_flag
    _atom_site_refinement_flags_posn
    _atom_site_refinement_flags_adp
    _atom_site_refinement_flags_occupancy
    _atom_site_disorder_assembly
    _atom_site_disorder_group
N3 N 0.2062(3) 0.22923(8) 0.69098(16) 0.0230(4) Uani 1 1 d . . . . .
O8 O 0.4703(2) 0.43013(7) 0.38103(14) 0.0286(4) Uani 1 1 d . . . . .
N7 N 0.3716(3) 0.43515(9) 0.57431(16) 0.0222(4) Uani 1 1 d . . . . .
N1 N 0.2626(2) 0.30339(8) 0.55514(15) 0.0177(4) Uani 1 1 d . . . . .
C9 C 0.3082(3) 0.33165(9) 0.43472(19) 0.0182(5) Uani 1 1 d . . . . .
H9 H 0.4127 0.3035 0.413 0.022 Uiso 1 1 calc R U . . .
N4 N 0.2179(3) 0.29083(8) 0.75465(16) 0.0218(4) Uani 1 1 d . . . . .
C8 C 0.3906(3) 0.40337(10) 0.4634(2) 0.0206(5) Uani 1 1 d . . . . .
C11 C 0.1632(3) 0.31434(10) 0.18954(19) 0.0214(5) Uani 1 1 d . . . . .
H11 H 0.2902 0.3028 0.1822 0.026 Uiso 1 1 calc R U . . .
N2 N 0.2330(3) 0.23593(8) 0.57084(17) 0.0221(4) Uani 1 1 d . . . . .
C10 C 0.1312(3) 0.33113(9) 0.31378(19) 0.0184(5) Uani 1 1 d . . . . .
C5 C 0.2541(3) 0.33598(10) 0.66781(19) 0.0176(5) Uani 1 1 d . . . . .
C62 C 0.3611(3) 0.41793(10) 0.94023(19) 0.0217(5) Uani 1 1 d . . . . .
H62A H 0.4603 0.4328 1.0187 0.026 Uiso 1 1 calc R U . . .
H62B H 0.3361 0.3699 0.9511 0.026 Uiso 1 1 calc R U . . .
C61 C 0.4411(3) 0.42773(10) 0.81604(19) 0.0203(5) Uani 1 1 d . . . . .
H61A H 0.5564 0.3987 0.8231 0.024 Uiso 1 1 calc R U . . .
H61B H 0.4841 0.4745 0.813 0.024 Uiso 1 1 calc R U . . .
C6 C 0.2873(3) 0.41122(10) 0.68478(19) 0.0181(5) Uani 1 1 d . . . . .
C65 C 0.0914(3) 0.45003(10) 0.6789(2) 0.0220(5) Uani 1 1 d . . . . .
H65A H 0.1135 0.4983 0.6685 0.026 Uiso 1 1 calc R U . . .
H65B H -0.0084 0.435 0.6008 0.026 Uiso 1 1 calc R U . . .
C15 C -0.0582(3) 0.34888(10) 0.3237(2) 0.0216(5) Uani 1 1 d . . . . .
H15 H -0.0805 0.3599 0.4068 0.026 Uiso 1 1 calc R U . . .
C12 C 0.0056(3) 0.31469(10) 0.0761(2) 0.0249(5) Uani 1 1 d . . . . .
H12 H 0.0267 0.3028 -0.0068 0.03 Uiso 1 1 calc R U . . .
C64 C 0.0130(3) 0.43939(11) 0.8030(2) 0.0245(5) Uani 1 1 d . . . . .
H64A H -0.0253 0.3921 0.8077 0.029 Uiso 1 1 calc R U . . .
H64B H -0.1045 0.4673 0.7967 0.029 Uiso 1 1 calc R U . . .
C13 C -0.1823(4) 0.33283(10) 0.0871(2) 0.0271(5) Uani 1 1 d . . . . .
H13 H -0.2877 0.3333 0.0113 0.033 Uiso 1 1 calc R U . . .
C63 C 0.1690(3) 0.45795(10) 0.9302(2) 0.0236(5) Uani 1 1 d . . . . .
H63A H 0.1173 0.4482 1.0078 0.028 Uiso 1 1 calc R U . . .
H63B H 0.197 0.5063 0.93 0.028 Uiso 1 1 calc R U . . .
C14 C -0.2141(3) 0.35034(10) 0.2106(2) 0.0255(5) Uani 1 1 d . . . . .
H14 H -0.3405 0.3631 0.2175 0.031 Uiso 1 1 calc R U . . .
H7 H 0.428(3) 0.4780(11) 0.5859(19) 0.026(6) Uiso 1 1 d . . . . .
 
loop_
    _atom_site_aniso_label
    _atom_site_aniso_U_11
    _atom_site_aniso_U_22
    _atom_site_aniso_U_33
    _atom_site_aniso_U_23
    _atom_site_aniso_U_13
    _atom_site_aniso_U_12
N3 0.0234(11) 0.0211(10) 0.0233(10) 0.0018(7) 0.0034(8) -0.0022(8)
O8 0.0396(10) 0.0257(9) 0.0258(8) -0.0039(6) 0.0183(8) -0.0123(7)
N7 0.0310(11) 0.0181(10) 0.0192(9) -0.0031(7) 0.0091(8) -0.0075(8)
N1 0.0186(10) 0.0155(9) 0.0186(9) 0.0014(7) 0.0040(8) -0.0021(7)
C9 0.0190(11) 0.0174(11) 0.0193(10) -0.0002(8) 0.0068(9) -0.0005(8)
N4 0.0235(11) 0.0177(10) 0.0237(9) 0.0011(7) 0.0047(8) -0.0016(7)
C8 0.0213(12) 0.0216(11) 0.0191(11) -0.0001(9) 0.0053(10) -0.0011(9)
C11 0.0244(13) 0.0176(11) 0.0234(11) -0.0004(8) 0.0084(10) 0.0001(9)
N2 0.0218(10) 0.0176(9) 0.0254(10) 0.0007(7) 0.0032(8) -0.0014(7)
C10 0.0223(12) 0.0133(10) 0.0200(10) 0.0011(8) 0.0060(10) -0.0027(8)
C5 0.0151(11) 0.0200(11) 0.0164(10) 0.0009(8) 0.0015(9) 0.0004(8)
C62 0.0230(13) 0.0244(12) 0.0173(10) -0.0018(8) 0.0040(10) -0.0001(9)
C61 0.0184(12) 0.0207(11) 0.0222(11) -0.0019(8) 0.0054(10) -0.0027(8)
C6 0.0222(12) 0.0184(11) 0.0149(10) 0.0004(8) 0.0067(9) -0.0024(8)
C65 0.0237(13) 0.0184(11) 0.0228(11) -0.0004(8) 0.0034(10) 0.0002(9)
C15 0.0259(13) 0.0177(11) 0.0213(11) -0.0016(8) 0.0062(10) -0.0011(9)
C12 0.0353(14) 0.0228(12) 0.0171(10) 0.0034(8) 0.0074(11) -0.0020(10)
C64 0.0191(12) 0.0245(12) 0.0312(12) 0.0000(9) 0.0084(10) 0.0033(9)
C13 0.0298(14) 0.0243(12) 0.0236(12) 0.0054(9) -0.0005(11) -0.0010(10)
C63 0.0281(13) 0.0229(12) 0.0229(11) -0.0010(9) 0.0125(10) -0.0008(9)
C14 0.0224(13) 0.0214(12) 0.0316(12) 0.0028(9) 0.0045(11) 0.0014(9)
 
 
#----------------------------------------------------------------------------#
#                   MOLECULAR GEOMETRY                                       #
#----------------------------------------------------------------------------#
 
_geom_special_details
;
 All esds (except the esd in the dihedral angle between two l.s. planes)
 are estimated using the full covariance matrix.  The cell esds are taken
 into account individually in the estimation of esds in distances, angles
 and torsion angles; correlations between esds in cell parameters are only
 used when they are defined by crystal symmetry.  An approximate (isotropic)
 treatment of cell esds is used for estimating esds involving l.s. planes.
;
loop_
    _geom_bond_atom_site_label_1
    _geom_bond_atom_site_label_2
    _geom_bond_distance
    _geom_bond_site_symmetry_2
    _geom_bond_publ_flag
N3 N2 1.301(2) . ?
N3 N4 1.369(2) . ?
O8 C8 1.236(2) . ?
N7 C8 1.335(2) . ?
N7 C6 1.476(3) . ?
N7 H7 0.92(2) . ?
N1 C5 1.338(2) . ?
N1 N2 1.357(2) . ?
N1 C9 1.461(2) . ?
C9 C10 1.521(3) . ?
C9 C8 1.522(3) . ?
C9 H9 0.98 . ?
N4 C5 1.326(2) . ?
C11 C10 1.389(3) . ?
C11 C12 1.391(3) . ?
C11 H11 0.93 . ?
C10 C15 1.386(3) . ?
C5 C6 1.500(3) . ?
C62 C61 1.524(3) . ?
C62 C63 1.528(3) . ?
C62 H62A 0.97 . ?
C62 H62B 0.97 . ?
C61 C6 1.538(3) . ?
C61 H61A 0.97 . ?
C61 H61B 0.97 . ?
C6 C65 1.545(3) . ?
C65 C64 1.520(3) . ?
C65 H65A 0.97 . ?
C65 H65B 0.97 . ?
C15 C14 1.383(3) . ?
C15 H15 0.93 . ?
C12 C13 1.381(3) . ?
C12 H12 0.93 . ?
C64 C63 1.525(3) . ?
C64 H64A 0.97 . ?
C64 H64B 0.97 . ?
C13 C14 1.385(3) . ?
C13 H13 0.93 . ?
C63 H63A 0.97 . ?
C63 H63B 0.97 . ?
C14 H14 0.93 . ?
 
loop_
    _geom_angle_atom_site_label_1
    _geom_angle_atom_site_label_2
    _geom_angle_atom_site_label_3
    _geom_angle
    _geom_angle_site_symmetry_1
    _geom_angle_site_symmetry_3
    _geom_angle_publ_flag
N2 N3 N4 111.09(15) . . ?
C8 N7 C6 130.49(18) . . ?
C8 N7 H7 114.1(13) . . ?
C6 N7 H7 115.2(13) . . ?
C5 N1 N2 108.93(16) . . ?
C5 N1 C9 128.10(16) . . ?
N2 N1 C9 122.86(16) . . ?
N1 C9 C10 113.19(17) . . ?
N1 C9 C8 109.63(15) . . ?
C10 C9 C8 110.79(15) . . ?
N1 C9 H9 107.7 . . ?
C10 C9 H9 107.7 . . ?
C8 C9 H9 107.7 . . ?
C5 N4 N3 105.54(16) . . ?
O8 C8 N7 122.73(19) . . ?
O8 C8 C9 118.04(18) . . ?
N7 C8 C9 119.22(18) . . ?
C10 C11 C12 120.2(2) . . ?
C10 C11 H11 119.9 . . ?
C12 C11 H11 119.9 . . ?
N3 N2 N1 105.83(15) . . ?
C15 C10 C11 119.58(19) . . ?
C15 C10 C9 121.88(18) . . ?
C11 C10 C9 118.51(19) . . ?
N4 C5 N1 108.61(17) . . ?
N4 C5 C6 129.04(18) . . ?
N1 C5 C6 122.33(18) . . ?
C61 C62 C63 111.54(17) . . ?
C61 C62 H62A 109.3 . . ?
C63 C62 H62A 109.3 . . ?
C61 C62 H62B 109.3 . . ?
C63 C62 H62B 109.3 . . ?
H62A C62 H62B 108 . . ?
C62 C61 C6 113.20(17) . . ?
C62 C61 H61A 108.9 . . ?
C6 C61 H61A 108.9 . . ?
C62 C61 H61B 108.9 . . ?
C6 C61 H61B 108.9 . . ?
H61A C61 H61B 107.8 . . ?
N7 C6 C5 107.60(16) . . ?
N7 C6 C61 106.82(16) . . ?
C5 C6 C61 111.35(16) . . ?
N7 C6 C65 108.73(16) . . ?
C5 C6 C65 111.94(17) . . ?
C61 C6 C65 110.19(16) . . ?
C64 C65 C6 112.92(16) . . ?
C64 C65 H65A 109 . . ?
C6 C65 H65A 109 . . ?
C64 C65 H65B 109 . . ?
C6 C65 H65B 109 . . ?
H65A C65 H65B 107.8 . . ?
C14 C15 C10 120.2(2) . . ?
C14 C15 H15 119.9 . . ?
C10 C15 H15 119.9 . . ?
C13 C12 C11 119.7(2) . . ?
C13 C12 H12 120.1 . . ?
C11 C12 H12 120.1 . . ?
C65 C64 C63 111.38(18) . . ?
C65 C64 H64A 109.4 . . ?
C63 C64 H64A 109.4 . . ?
C65 C64 H64B 109.4 . . ?
C63 C64 H64B 109.4 . . ?
H64A C64 H64B 108 . . ?
C12 C13 C14 120.2(2) . . ?
C12 C13 H13 119.9 . . ?
C14 C13 H13 119.9 . . ?
C64 C63 C62 111.05(16) . . ?
C64 C63 H63A 109.4 . . ?
C62 C63 H63A 109.4 . . ?
C64 C63 H63B 109.4 . . ?
C62 C63 H63B 109.4 . . ?
H63A C63 H63B 108 . . ?
C15 C14 C13 120.1(2) . . ?
C15 C14 H14 120 . . ?
C13 C14 H14 120 . . ?
 
loop_
    _geom_torsion_atom_site_label_1
    _geom_torsion_atom_site_label_2
    _geom_torsion_atom_site_label_3
    _geom_torsion_atom_site_label_4
    _geom_torsion
    _geom_torsion_site_symmetry_1
    _geom_torsion_site_symmetry_2
    _geom_torsion_site_symmetry_3
    _geom_torsion_site_symmetry_4
    _geom_torsion_publ_flag
C5 N1 C9 C10 -112.1(2) . . . . ?
N2 N1 C9 C10 72.0(2) . . . . ?
C5 N1 C9 C8 12.1(3) . . . . ?
N2 N1 C9 C8 -163.71(17) . . . . ?
N2 N3 N4 C5 -0.3(2) . . . . ?
C6 N7 C8 O8 -178.1(2) . . . . ?
C6 N7 C8 C9 3.0(3) . . . . ?
N1 C9 C8 O8 167.11(18) . . . . ?
C10 C9 C8 O8 -67.3(2) . . . . ?
N1 C9 C8 N7 -13.9(3) . . . . ?
C10 C9 C8 N7 111.7(2) . . . . ?
N4 N3 N2 N1 -0.1(2) . . . . ?
C5 N1 N2 N3 0.4(2) . . . . ?
C9 N1 N2 N3 176.90(17) . . . . ?
C12 C11 C10 C15 -0.6(3) . . . . ?
C12 C11 C10 C9 -178.66(17) . . . . ?
N1 C9 C10 C15 42.1(2) . . . . ?
C8 C9 C10 C15 -81.5(2) . . . . ?
N1 C9 C10 C11 -139.92(18) . . . . ?
C8 C9 C10 C11 96.5(2) . . . . ?
N3 N4 C5 N1 0.5(2) . . . . ?
N3 N4 C5 C6 -178.0(2) . . . . ?
N2 N1 C5 N4 -0.6(2) . . . . ?
C9 N1 C5 N4 -176.85(18) . . . . ?
N2 N1 C5 C6 178.07(17) . . . . ?
C9 N1 C5 C6 1.8(3) . . . . ?
C63 C62 C61 C6 -54.1(2) . . . . ?
C8 N7 C6 C5 10.5(3) . . . . ?
C8 N7 C6 C61 130.2(2) . . . . ?
C8 N7 C6 C65 -110.9(2) . . . . ?
N4 C5 C6 N7 165.6(2) . . . . ?
N1 C5 C6 N7 -12.7(3) . . . . ?
N4 C5 C6 C61 48.9(3) . . . . ?
N1 C5 C6 C61 -129.4(2) . . . . ?
N4 C5 C6 C65 -75.0(3) . . . . ?
N1 C5 C6 C65 106.7(2) . . . . ?
C62 C61 C6 N7 169.55(16) . . . . ?
C62 C61 C6 C5 -73.2(2) . . . . ?
C62 C61 C6 C65 51.6(2) . . . . ?
N7 C6 C65 C64 -168.91(16) . . . . ?
C5 C6 C65 C64 72.3(2) . . . . ?
C61 C6 C65 C64 -52.1(2) . . . . ?
C11 C10 C15 C14 -0.5(3) . . . . ?
C9 C10 C15 C14 177.51(17) . . . . ?
C10 C11 C12 C13 1.0(3) . . . . ?
C6 C65 C64 C63 55.1(2) . . . . ?
C11 C12 C13 C14 -0.3(3) . . . . ?
C65 C64 C63 C62 -55.9(2) . . . . ?
C61 C62 C63 C64 55.3(2) . . . . ?
C10 C15 C14 C13 1.2(3) . . . . ?
C12 C13 C14 C15 -0.8(3) . . . . ?
 
# The following lines are used to test the character set of files sent by
# network email or other means. They are not part of the CIF data set
# abcdefghijklmnopqrstuvwxyzABCDEFGHIJKLMNOPQRSTUVWXYZ0123456789
# !@#$%^&*()_+{}:"~<>?|\-=[];'`,./
 
# END of CIF
